# Supplementary material
Source: ML conference proceedings conference paper supplement (https://openaccess.thecvf.com/content/WACV_2020/html/Kimura_Adversarial_Discriminative_Attention_WACV_2020_paper.html)
Supplement: Supplementary file 1 [file Kimura_Adversarial_Discriminative_Attention_WACV_2020_supplemental.pdf]

Archive with 5 entries (4 files):
- 0593_supplemental.pdf
- __MACOSX/
- __MACOSX/._0593_supplemental.pdf
- 0593_video.mp4
- __MACOSX/._0593_video.mp4
