# Supplementary material
Source: ML conference proceedings conference paper supplement (https://openaccess.thecvf.com/content/WACV_2020/html/Kimura_Adversarial_Discriminative_Attention_WACV_2020_paper.html)
Supplement: Supplementary file 1 [file Kimura_Adversarial_Discriminative_Attention_WACV_2020_supplemental.pdf › 0593_supplemental.pdf]

# Adversarial Discriminative Attention for Robust Anomaly Detection

Daiki Kimura  
IBM Research AI  
daiki@jp.ibm.com

Subhajit Chaudhury  
IBM Research AI  
subhajit@jp.ibm.com

Minori Narita  
University of Massachusetts, Amherst  
mnarita@umass.edu

Asim Munawar  
IBM Research AI  
asim@jp.ibm.com

Ryuki Tachibana  
IBM Research AI  
ryuki@jp.ibm.com

## 1. Dataset details

### 1.1. Pigeon gesture

We used a Microsoft Kinect Sensor v2 for Windows to take the photos. We used only the depth images, because depth information is suitable for detecting human hand gesture than color (RGB) information. Hence, the initial image size is  $512 \times 424$  from the sensor. We cropped the center  $424 \times 424$  image, then resized to  $84 \times 84$  image. The reasons to use small images are the short processing time during the actual detection with patients and making the evaluation problem setting difficult.

During the taking images of each pose, we instructed participants to finish making the pose before shooting. Then we asked him/her to change the position of hand, hand angles, open/close fingers, and sitting position which means we asked to change an angle between his/her back and thigh. Also, we took 3 times to shoot; the participant sits different position (right side of chair, middle of chair, left side of chair) for each shooting. One shooting consists 1,000 frame images, hence we took 3,000 images for each person and each posture. In this paper, we did random sampling small number (mentioned in the paper) for each random seed.

### 1.2. Venus images

We used images taken by Venusian orbiter Akatsuki. Thick clouds that extend more than 65 km are entirely covering the Venusian body and rotating around it at high speed (approximately  $100 \text{ ms}^{-1}$ ). On rare occasions, bow-shaped distinct structures appear and stay above the same geographical location. These structures are thought to be one of the keys to understand Venusian atmospheric mechanism [1]. Finding these stationary structures by automatic detection facilitates the investigation of the mechanism.

We made image patches using images taken from April 2016 to November 2016 at a wavelength of 283 nm. We

used images that have a latitude/longitude coordinate. We summed up several images for a day and extracted small-scale features that have the scale of fewer than 6 degrees both in latitude/longitude, by subtracting gaussian-smoothed image (FWHM of 6 degrees) from it. The total number of summed up images was 75. Then, we made image patches using a sliding window that has 24 degrees on a side. Anomaly image (stationary structure) patches are created by designating its spot manually.

## 2. Experiment details

The epoch number for MNIST dataset and Venus dataset is 100, and the number for public hand gesture dataset and pigeon dataset is 200.

## References

- [1] T. Fukuhara, M. Futaguchi, G. L. Hashimoto, T. Horinouchi, T. Imamura, N. Iwagami, T. Kouyama, S.-y. Murakami, M. Nakamura, K. Ogohara, et al. Large stationary gravity wave in the atmosphere of venus. *Nature Geoscience*, 10(2):85–88, 2017.
